# Supplementary material for: Betacellulin induces Slug-mediated down-regulation of E-cadherin and cell migration in ovarian cancer cells
Source: PubMed Central journal article supplement (PMC5045363; doi:10.18632/oncotarget.7591), 2016-04-23
Supplement: oncotarget-07-28881-s001.pdf [file oncotarget-07-28881-s001.pdf]

## Betacellulin induces Slug-mediated down-regulation of E-cadherin and cell migration in ovarian cancer cells

### SUPPLEMENTARY FIGURE

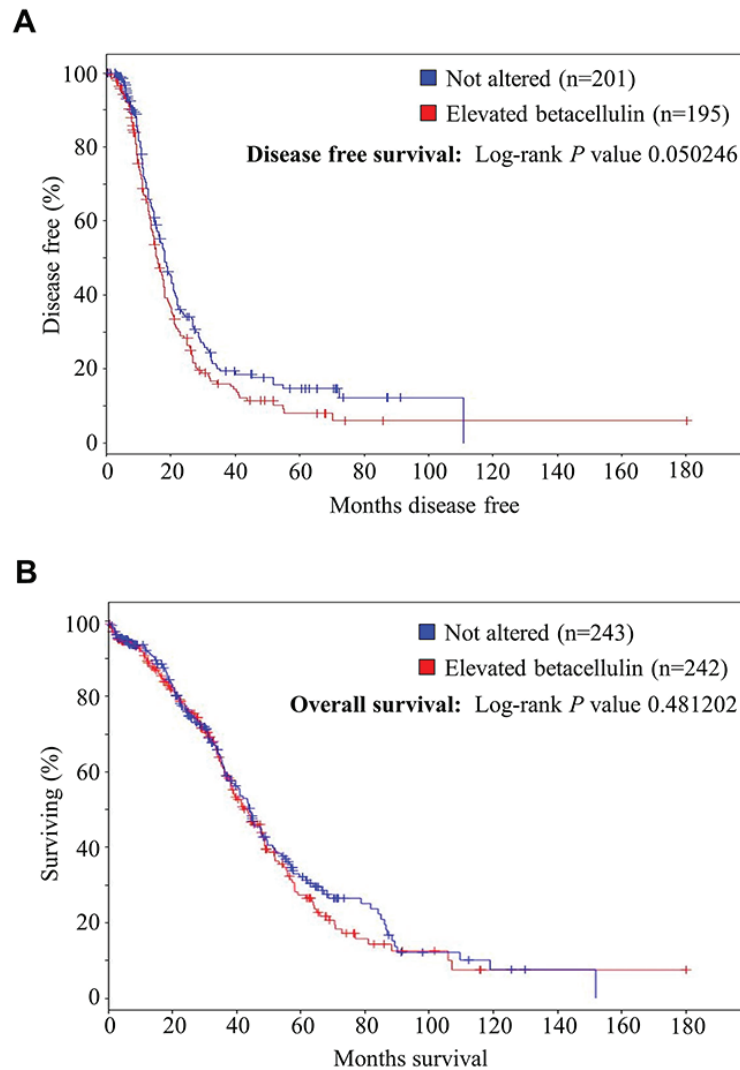

**Supplementary Figure S1: Elevated betacellulin is associated with reduced disease free survival but not overall survival in ovarian cancers.** The cBioPortal for Cancer Genomics was used to query ovarian carcinomas from The Cancer Genome Atlas (n=489) for up-regulation of betacellulin mRNA above the median. Disease free **A.** and overall **B.** survival differences between unaltered samples and those with elevated betacellulin are displayed as Kaplan-Meier survival curves with a  $P$  value from a Log-rank test.
